# Supplementary material for: Crystal engineering of SAPO-11 sieves by forming intermediate phases
Source: Royal Society of Chemistry journal article supplement (doi:10.1039/d3ce00278k), 2023-01-01
Supplement: d3ce00278k1.pdf [file d3ce00278k1.pdf]

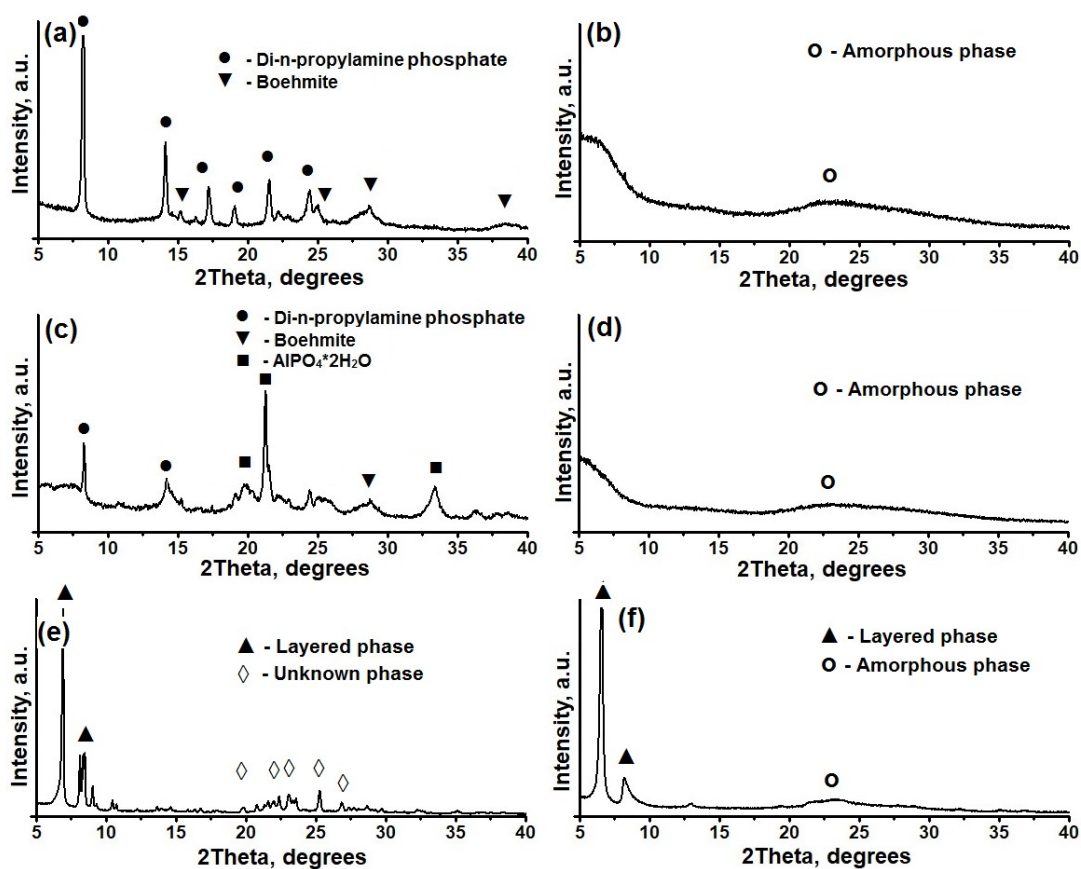

**Fig. 1** X-ray diffraction patterns of initial gels and intermediate phases: (a) - Sample Gel-Bh; (b) - Sample Gel-iAl; (c) - Sample IF-Bh-90; (d) - Sample IF-iAl-90; (e) - Sample IF-Bh-130; (f) - Sample IF-iAl-130.

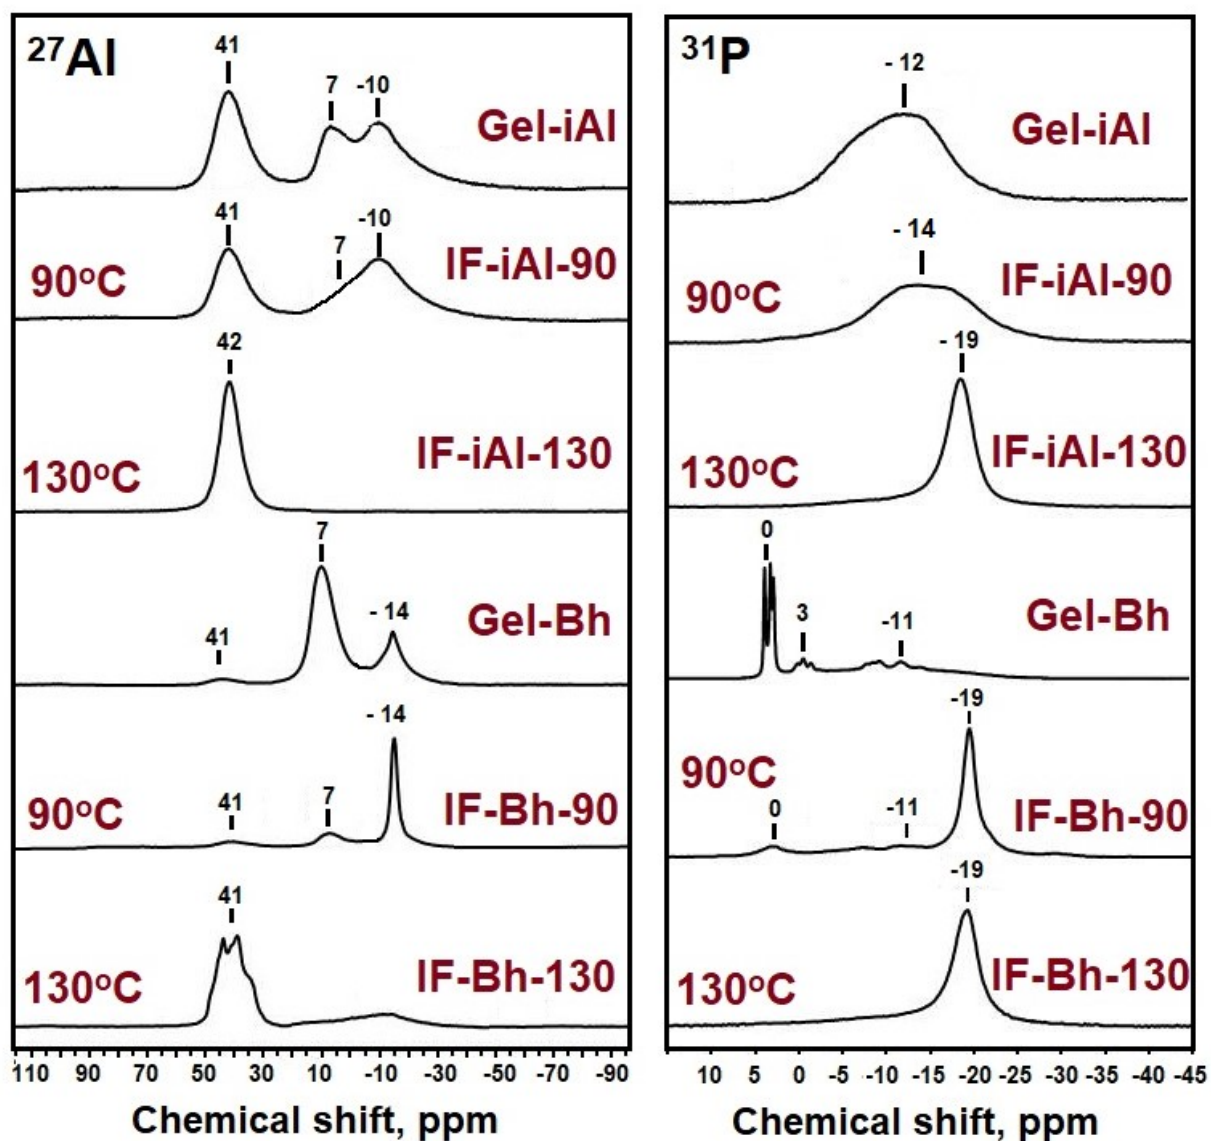

Fig. 2 MAS NMR  $^{27}\text{Al}$  and  $^{31}\text{P}$  spectra of initial gels and intermediate phases.

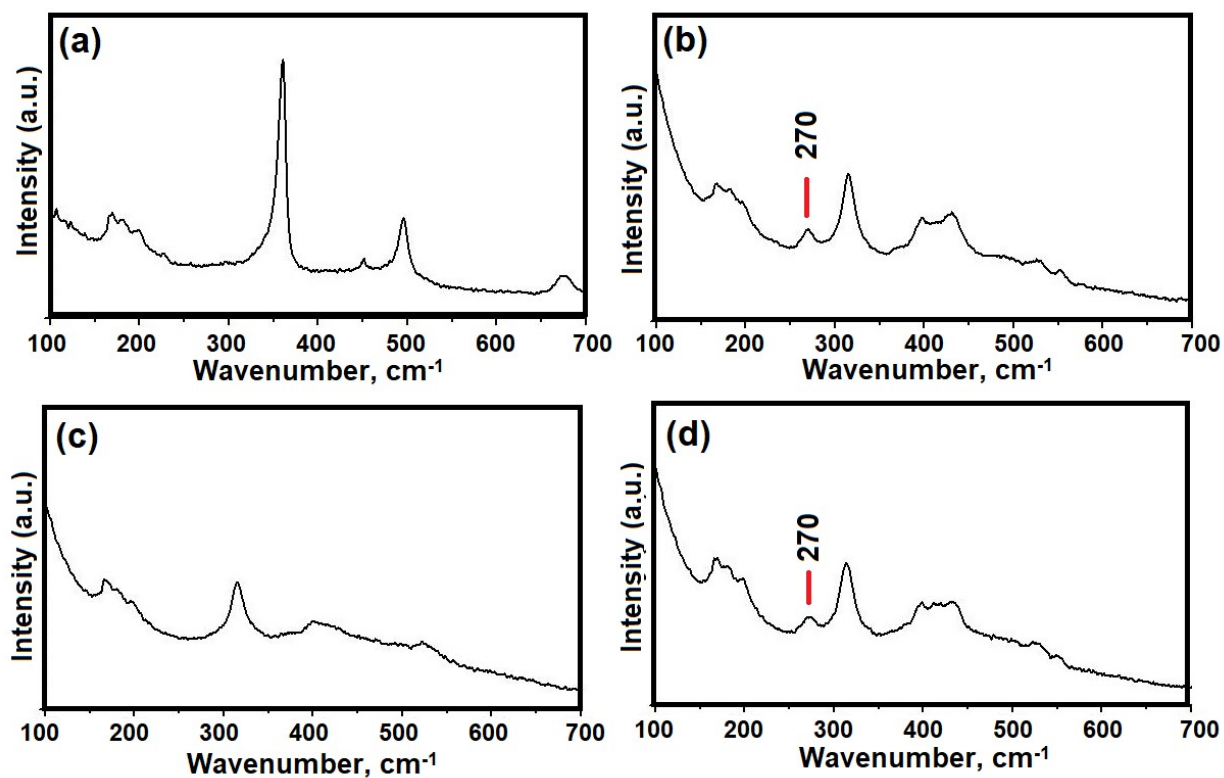

**Fig. 3** Raman spectra of intermediate phases: (a) - Sample IF-Bh-90; (b) Sample IF-Bh-130; (c) Sample IF-iAl-90; (d) - Sample IF-iAl-130

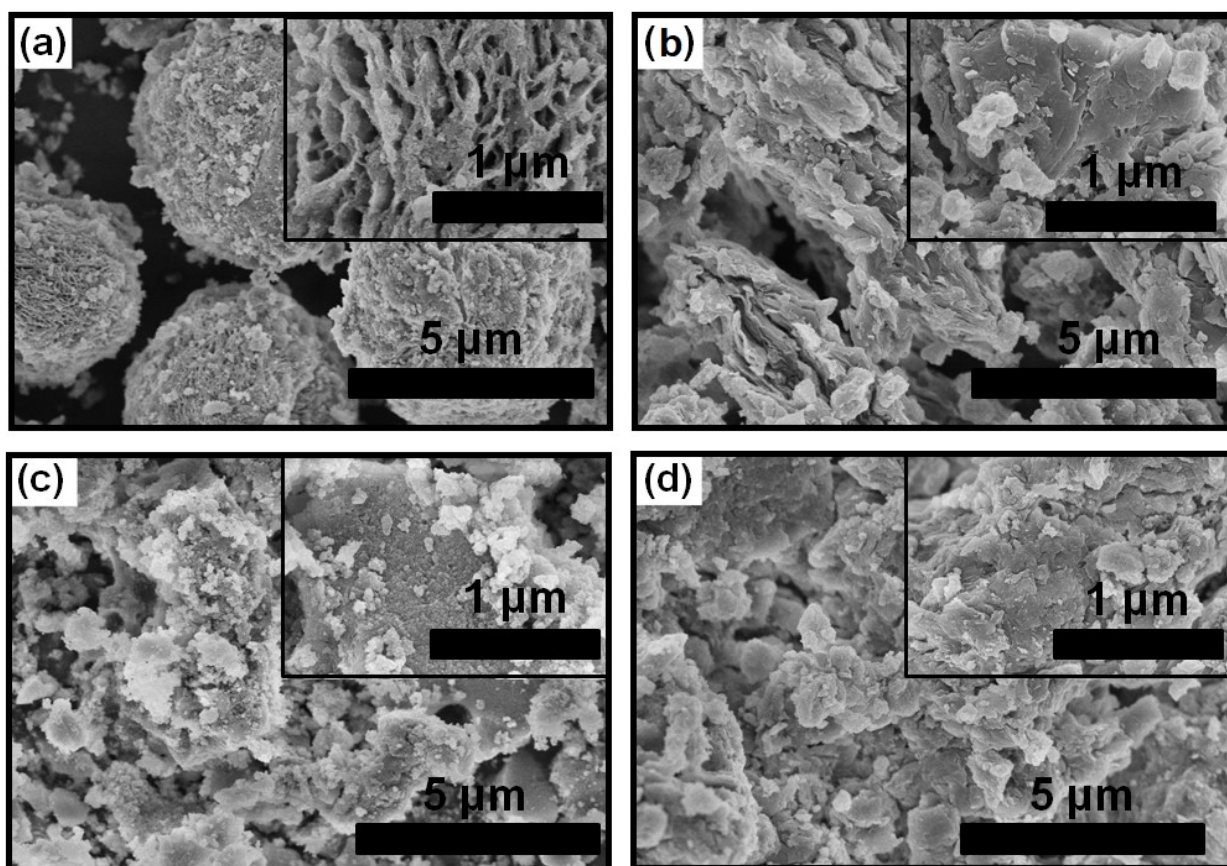

**Fig. 4** SEM images of intermediate phases: (a) Sample IF-Bh-90; (b) Sample IF-Bh-130; (c) Sample IF-iAl-90; (d) Sample IF-iAl-130

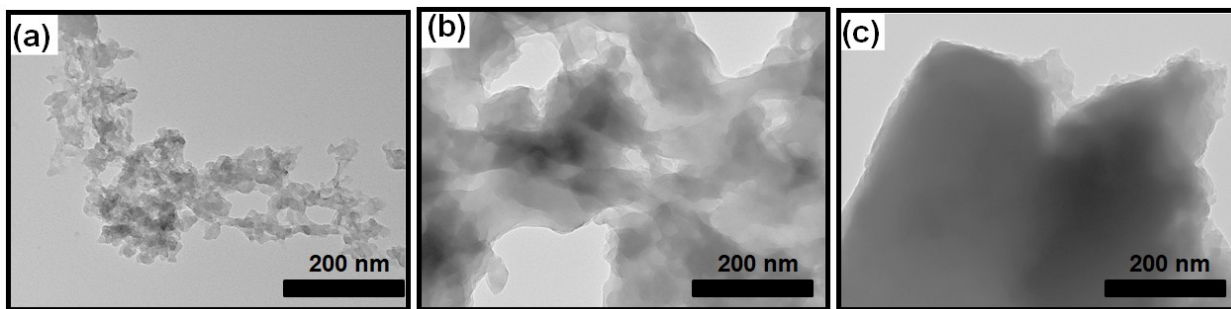

**Fig. 5** TEM images of intermediate phases: (a) Sample IF-iAl-90; (b) Sample IF-iAl-130; (c) Sample IF-Bh-130.

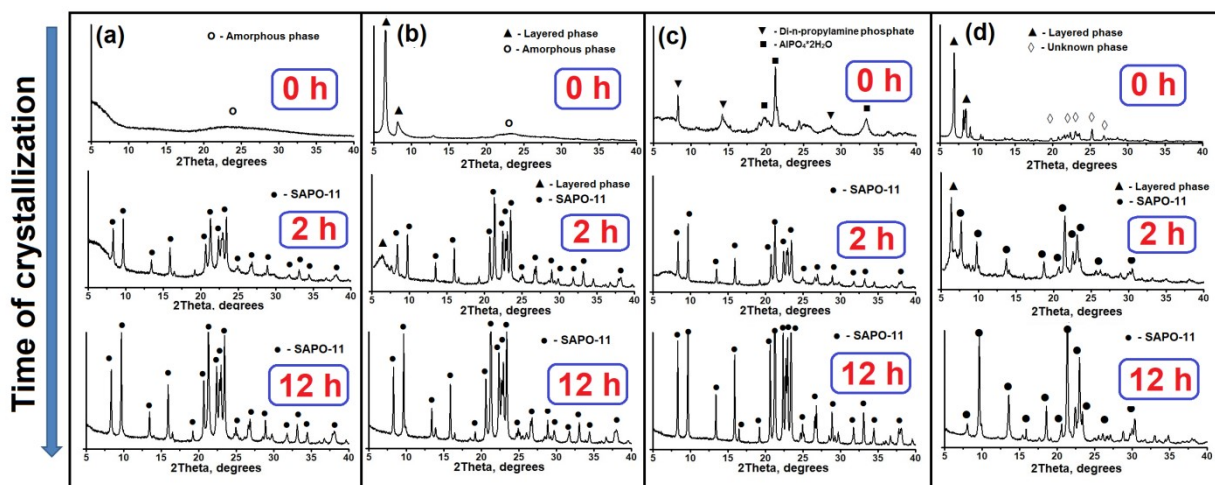

**Fig. 6** X-ray patterns of crystallization products of intermediate phases: (a) - Crystallization of the intermediate phase IF-iAl-90; (b) - Crystallization of the intermediate phase IF-iAl-130; (c) - Crystallization of the intermediate phase IF-Bh-90; (d) - Crystallization of the intermediate phase IF-Bh-130

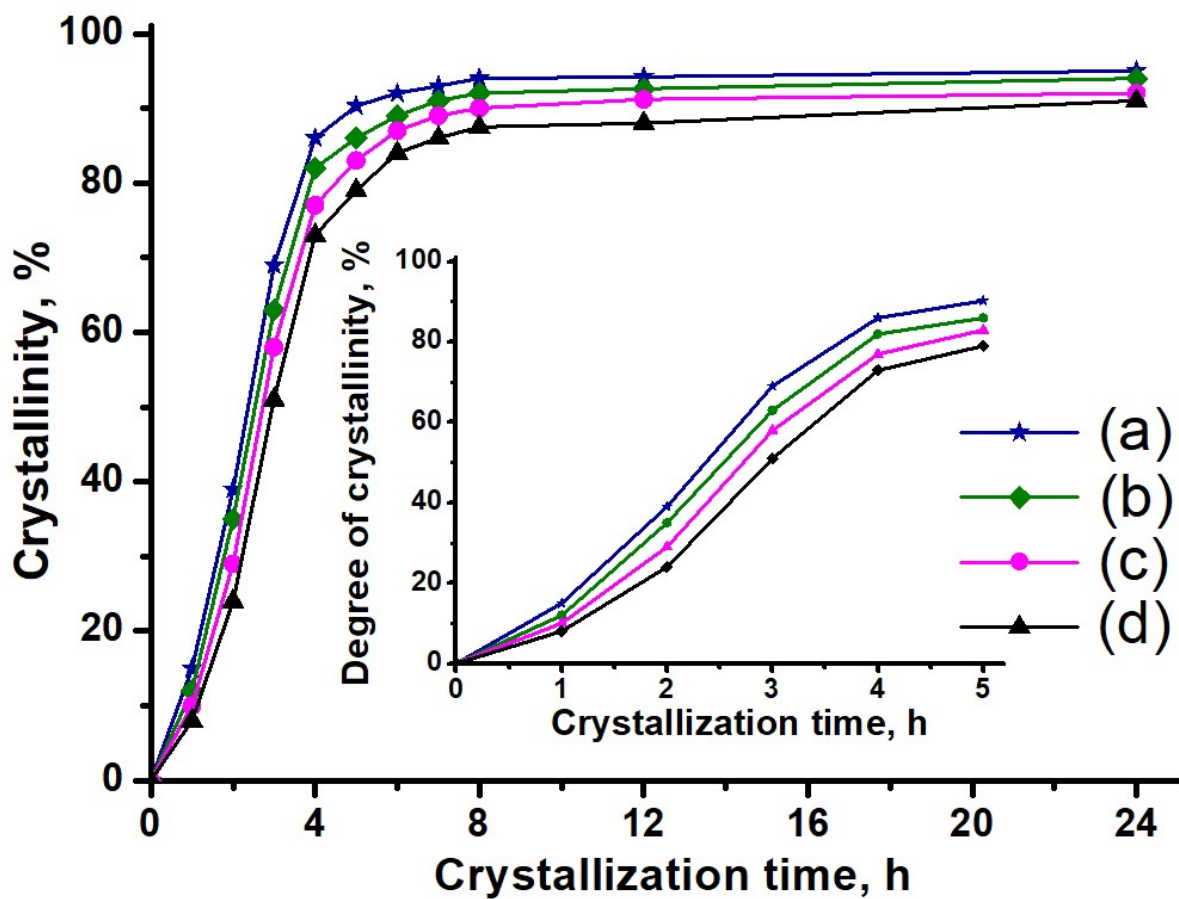

**Fig. 7** Crystallinity as a function of time for SAPO-11: (a) - Sample SAPO-11-iAl-130; (b) - Sample SAPO-11-Bh-130; (c) - Sample SAPO-11-iAl-90; (d) - Sample SAPO-11-Bh-90. *Inset:* degree of crystallinity of samples up to 5 h representing the nucleation and initial stage of crystallization of the samples.

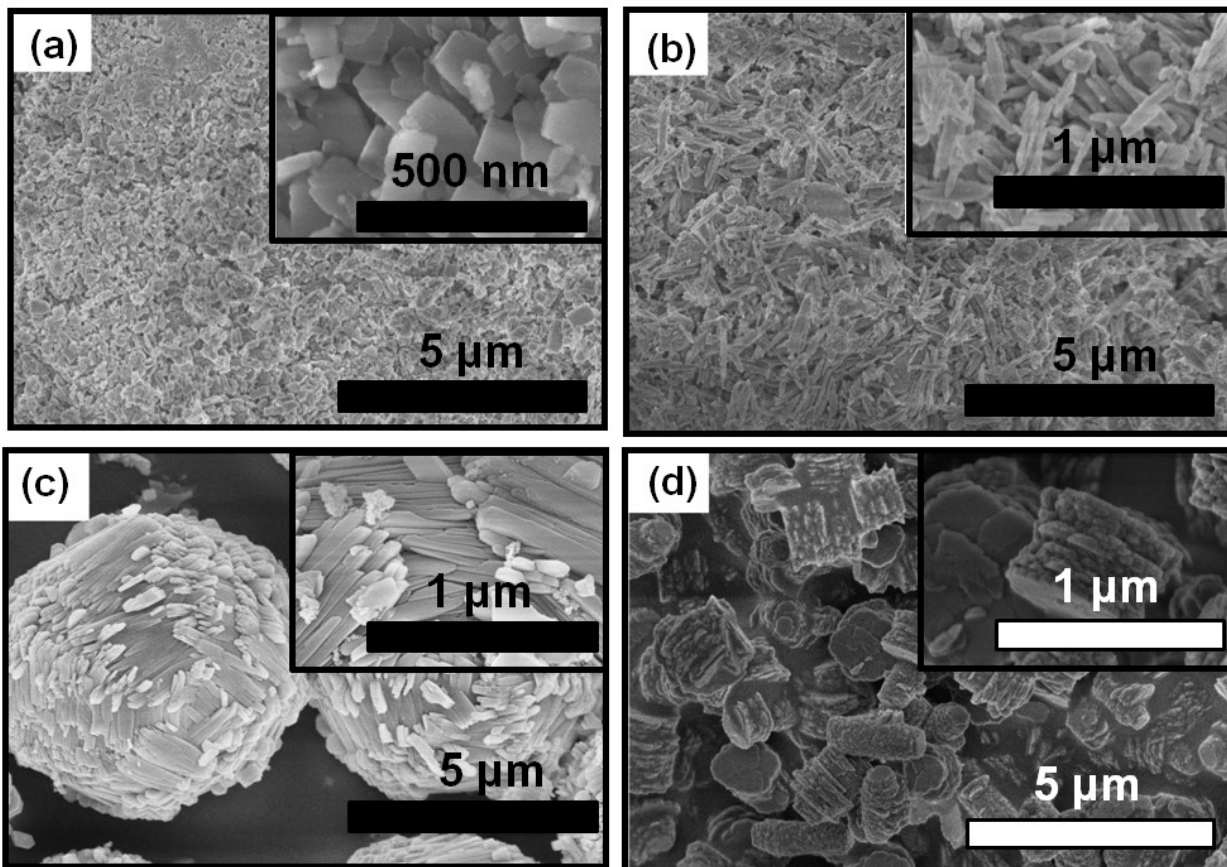

**Fig .8** SEM images of molecular sieves: (a) Sample SAPO-11-Bh-90; (b) Sample SAPO-11-Bh-130; (c) Sample SAPO-11-iAl-90; (d) Sample SAPO-11-iAl-130

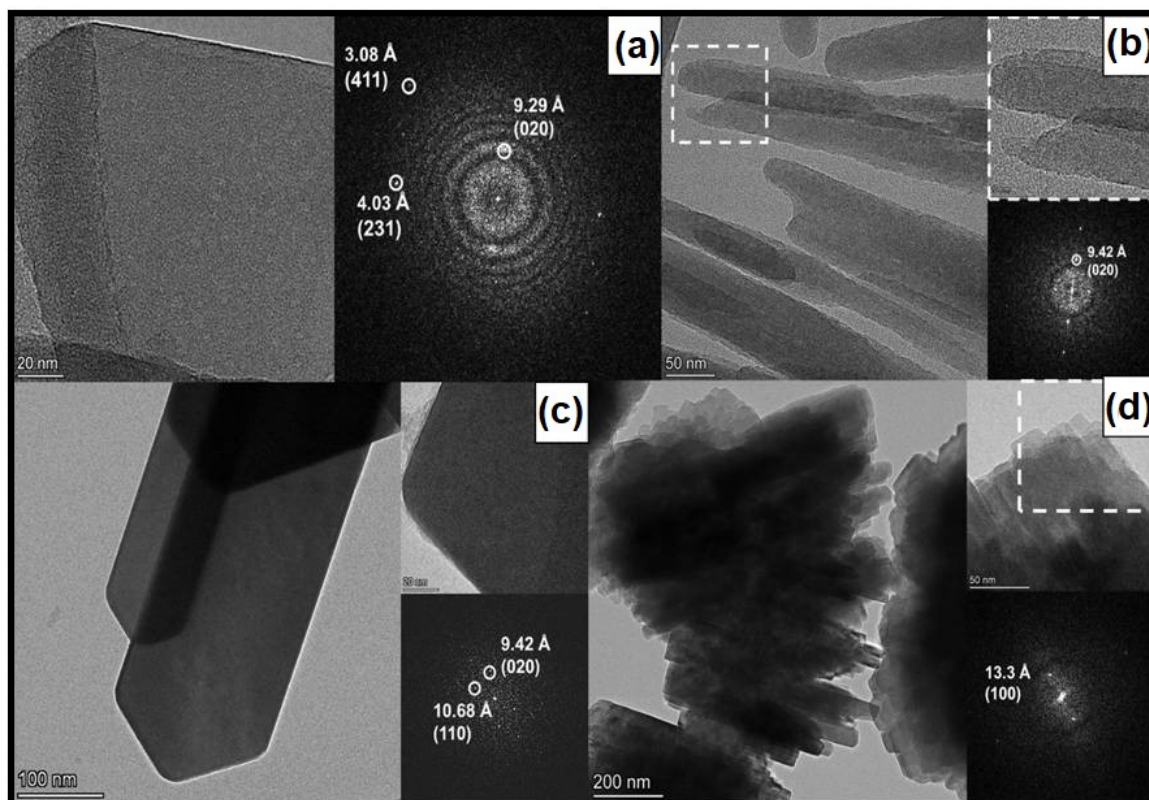

**Fig. 9** TEM and corresponding FFT images of molecular sieves: (a) Sample SAPO-11-Bh-90; (b) Sample SAPO-11-Bh-130; (c) Sample SAPO-11-iAl-90; (d) Sample SAPO-11-iAl-130

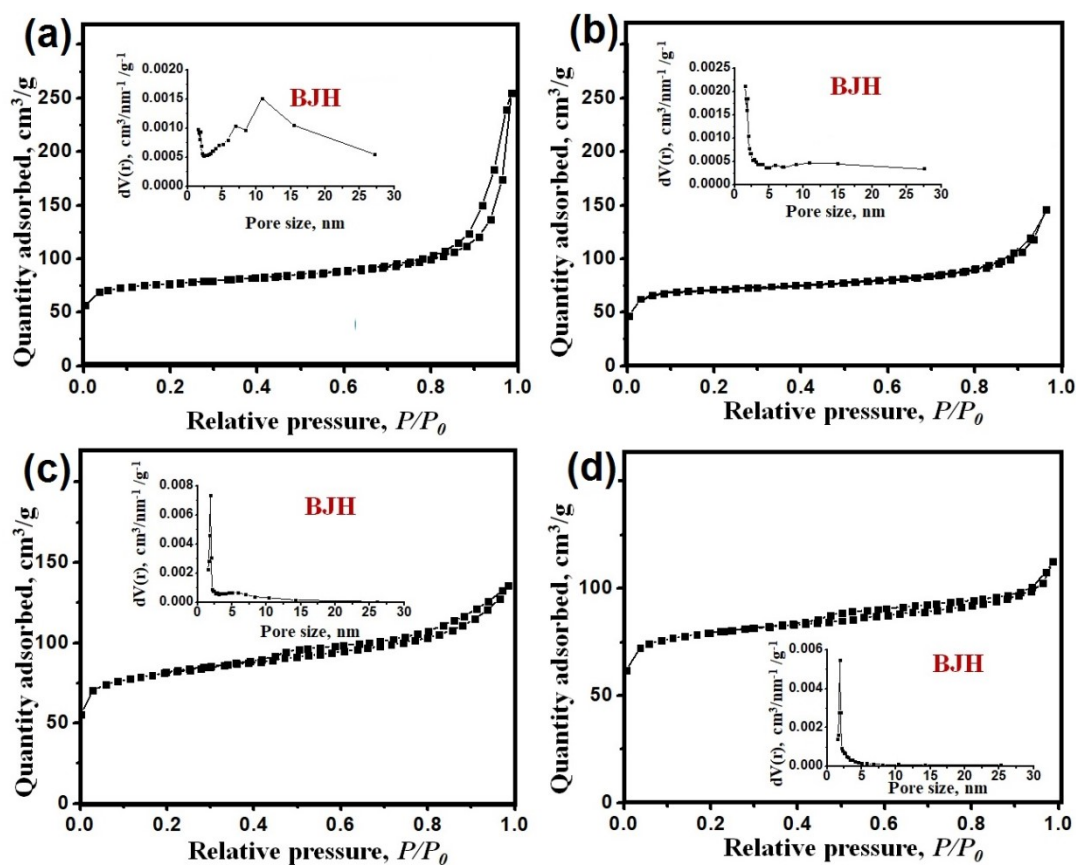

**Fig. 10** Nitrogen adsorption–desorption isotherms and pore size distribution of molecular sieves: (a) Sample SAPO-11-Bh-90; (b) Sample SAPO-11-Bh-130; (c) Sample SAPO-11-iAl-90; (d) Sample SAPO-11-iAl-130

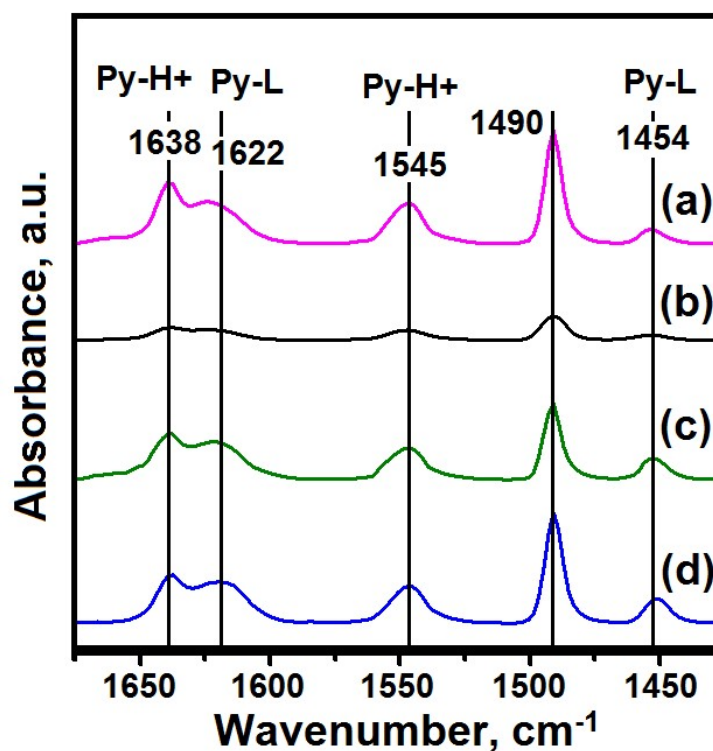

**Fig. 11** IR spectra of adsorbed pyridine for SAPO-11: (a) Sample SAPO-11-Bh-90; (b) Sample SAPO-11-Bh-130; (c) Sample SAPO-11-iAl-90; (d) Sample SAPO-11-iAl-130



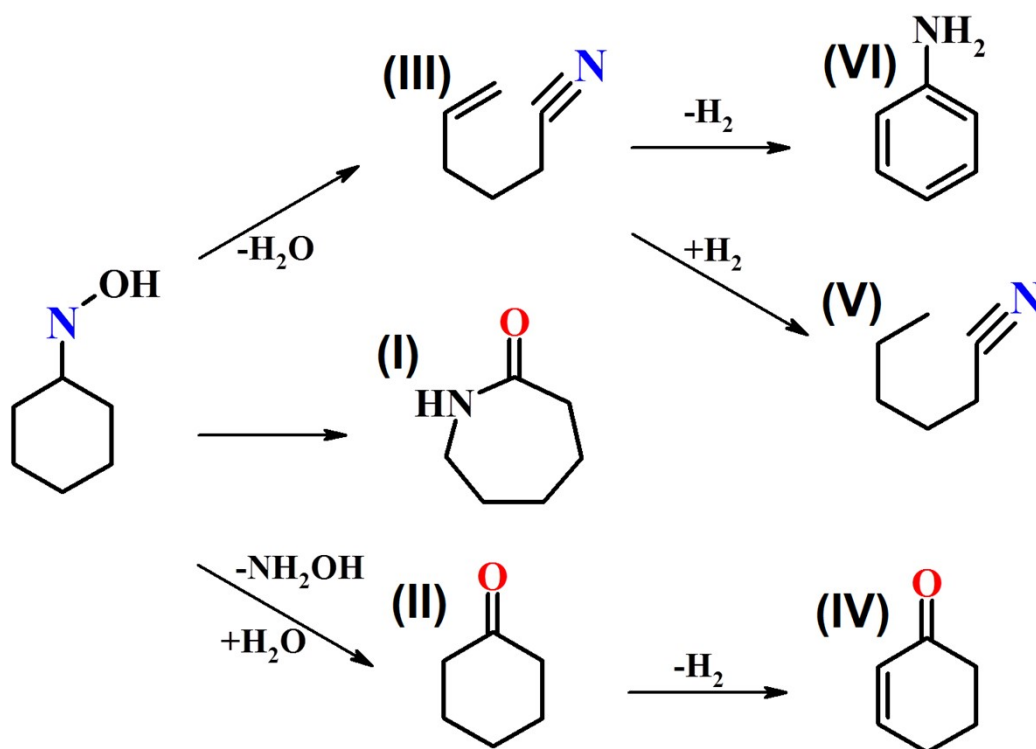

Fig. 12 Scheme of reactions of cyclohexanone oxime on acidic heterogeneous catalysts

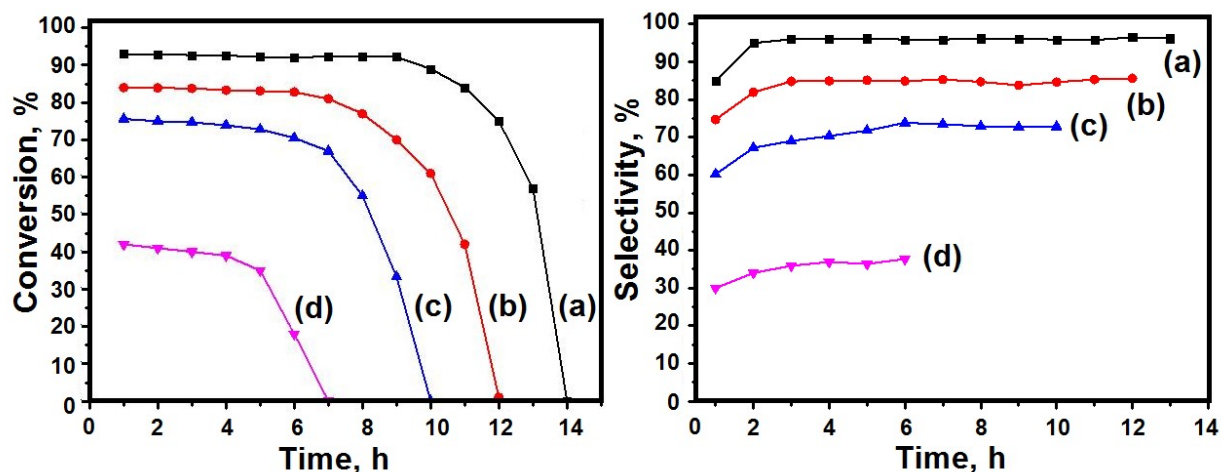

Fig. 13 Isomerization of cyclohexanone oxime on SAPO-11: (a) - Sample SAPO-11-iAl-130; (b) - Sample SAPO-11-Bh-90; (c) - Sample SAPO-11-iAl-90; (d) - Sample SAPO-11-Bh-130

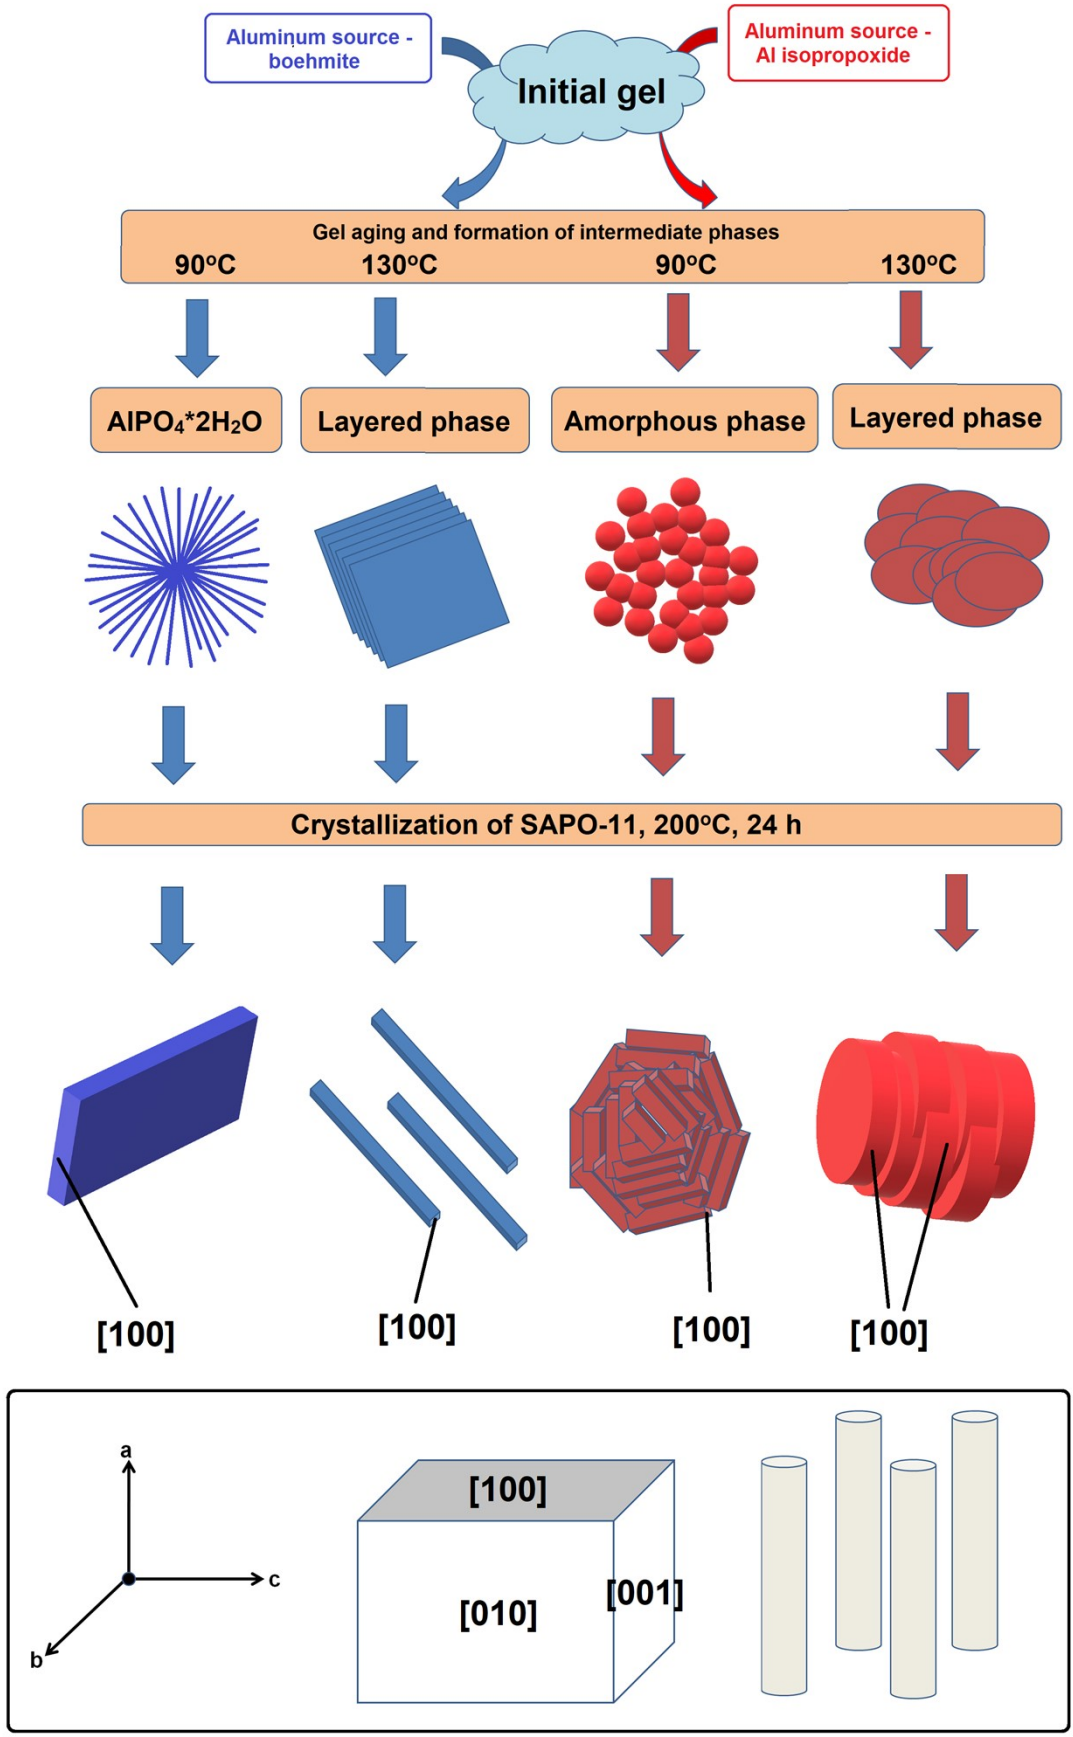

Fig. 14 Stages of crystallization of SAPO-11 molecular sieves using intermediate phases
